# Supplementary material for: Bio-carbon-layered CuO-catalyzed decarboxylative alkenylation of cyclic ethers
Source: Royal Society of Chemistry journal article supplement (doi:10.1039/d2nj01213h), 2022-01-01

# **Supporting Information**

## **Table of Contents**

|   |                                                      |        |
|---|------------------------------------------------------|--------|
| A | $^1\text{H}$ and $^{13}\text{C}$ NMR analytical data | S2-S6  |
| B | $^1\text{H}$ and $^{13}\text{C}$ NMR spectra         | S7-S22 |

**<sup>1</sup>H and <sup>13</sup>C NMR analytical data:**

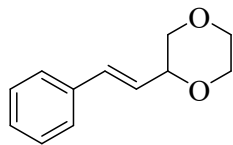

(*E*)-2-styryl-1,4-dioxane

<sup>1</sup>H NMR (400 MHz, CDCl<sub>3</sub>) δ = 7.63 – 7.34 (m, 2H), 7.34 – 7.27 (m, 2H), 7.27 – 7.09 (m, 1H), 6.68 (d, *J*=16, 1H), 6.07 (dd, *J*=16, 6, 1H), 4.26-4.21 (m, 1H), 3.92 – 3.77 (m, 3H), 3.75 – 3.72 (m, 1H), 3.68-3.61 (m, 1H), 3.41 (dd, *J*=11.5, 10.0, 1H).

<sup>13</sup>C NMR (100 MHz, CDCl<sub>3</sub>) δ = 136.64, 132.86, 128.81, 128.15, 126.71, 125.34, 76.30, 71.20, 66.82, 66.52.

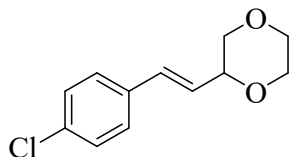

(*E*)-2-(4-chlorostyryl)-1,4-dioxane

<sup>1</sup>H NMR (400 MHz, CDCl<sub>3</sub>) δ = 7.60 – 7.02 (m, 5H), 6.63 (dd, *J*=16, 1H), 6.04 (dd, *J*=16, 6, 1H), 4.31 – 4.16 (m, 1H), 3.92 – 3.58 (m, 5H), 3.39 (dd, *J*=11, 10.0, 1H).

<sup>13</sup>C NMR (100 MHz, CDCl<sub>3</sub>) δ = 134.97, 133.66, 131.46, 128.85, 127.79, 125.86, 75.97, 70.95, 66.69, 66.38.

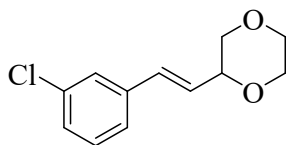

(*E*)-2-(3-chlorostyryl)-1,4-dioxane

<sup>1</sup>H NMR (400 MHz, CDCl<sub>3</sub>) δ = 7.39 – 7.34 (m, 1H), 7.25 – 7.19 (m, 3H), 6.63 (dd, *J*=16.0, 1.3, 1H), 6.09 (dd, *J*=16.0, 6.0, 1H), 4.30 – 4.20 (m, 1H), 3.93 – 3.71 (m, 4H), 3.65 (m, 1H), 3.40 (dd, *J*=11.5, 10.0, 1H).

<sup>13</sup>C NMR (100 MHz, CDCl<sub>3</sub>) δ = 138.39, 134.63, 131.21, 129.89, 127.90, 126.77, 126.46, 124.81, 75.83, 70.96, 66.67, 66.39.

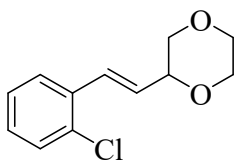

(*E*)-2-(2-chlorostyryl)-1,4-dioxane

<sup>1</sup>H NMR (400 MHz, CDCl<sub>3</sub>) δ = 7.57 – 7.45 (m, 1H), 7.38 – 7.31 (m, 1H), 7.24 – 7.14 (m, 2H), 7.07 (dd, *J*=16.2, 1.1, 1H), 6.07 (dd, *J*=16.0, 6.2, 1H), 4.31-4.26 (m, 1H), 3.94 – 3.71 (m, 4H), 3.71 – 3.62 (m, 1H), 3.43 (dd, *J*=11.5, 10.0, 1H).

<sup>13</sup>C NMR (100 MHz, CDCl<sub>3</sub>) δ = 134.79, 133.48, 129.95, 129.07, 129.02, 128.33, 128.23, 127.05, 76.19, 71.05, 66.78, 66.50.

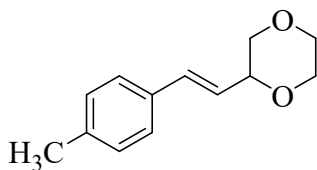

(*E*)-2-(4-methylstyryl)-1,4-dioxane

$^1\text{H}$  NMR (400 MHz,  $\text{CDCl}_3$ )  $\delta$  = 7.26 (d,  $J=8.4$ , 1H), 7.11 (d,  $J=8.0$ , 1H), 6.65 (d,  $J=16.1$ , 1H), 6.02 (dd,  $J=16.1$ , 6.3, 1H), 4.29 – 4.18 (m, 1H), 3.79 (m,  $J=12.1$ , 11.3, 6.9, 2.0, 2H), 3.65 (m,  $J=11.6$ , 10.4, 3.6, 1H), 3.41 (dd,  $J=11.5$ , 10.0, 1H), 2.33 (s, 1H).

$^{13}\text{C}$  NMR (100 MHz,  $\text{CDCl}_3$ )  $\delta$  = 138.05, 133.84, 132.92, 129.51, 126.66, 124.24, 76.44, 71.24, 66.84, 66.53, 21.45.

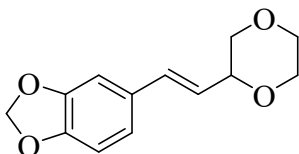

(*E*)-5-(2-(1,4-dioxan-2-yl)vinyl)benzo[1,3]dioxole

$^1\text{H}$  NMR (400 MHz,  $\text{CDCl}_3$ )  $\delta$  = 6.91 (d,  $J=1.7$ , 1H), 6.81 (dd,  $J=8.0$ , 1.6, 1H), 6.74 (d,  $J=8.0$ , 1H), 6.59 (dd,  $J=16.0$ , 1.2, 1H), 5.95 (s, 2H), 5.90 (dd,  $J=16.0$ , 6.3, 1H), 4.23-4.18 (m, 1H), 3.92 – 3.70 (m, 4H), 3.67-3.61 (m, 1H), 3.40 (dd,  $J=11.5$ , 10.0, 1H).

$^{13}\text{C}$  NMR (100 MHz,  $\text{CDCl}_3$ )  $\delta$  = 148.04, 147.52, 132.46, 130.87, 123.28, 121.40, 108.28, 105.72, 101.12, 76.12, 70.99, 66.61, 66.29.

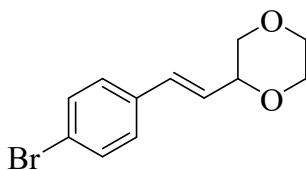

(*E*)-2-(4-bromostyryl)-1,4-dioxane

$^1\text{H}$  NMR (400 MHz,  $\text{CDCl}_3$ )  $\delta$  = 7.43 (dd,  $J=8.8$ , 2.1, 2H), 7.26 – 7.01 (m, 2H), 6.63 (d,  $J=16.6$ , 1H), 6.07 (dd,  $J=16.0$ , 6.2, 1H), 4.26-4.21 (m, 1H), 3.92 – 3.72 (m, 4H), 3.68-3.65 (m, 1H), 3.40 (dd,  $J=11.4$ , 10.1, 1H).

$^{13}\text{C}$  NMR (100 MHz,  $\text{CDCl}_3$ )  $\delta$  = 135.55, 131.96, 131.62, 128.27, 126.10, 121.96, 76.10, 71.01, 66.83, 66.52.

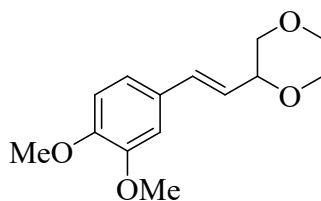

(*E*)-2-(3,4-dimethoxystyryl)-1,4-dioxane

$^1\text{H}$  NMR (400 MHz,  $\text{CDCl}_3$ )  $\delta$  = 6.97 – 6.84 (m, 2H), 6.79 (d,  $J=8.2$ , 1H), 6.60 (dd,  $J=16.1$ , 0.9, 1H), 5.93 (dd,  $J=16.0$ , 6.4, 1H), 4.34 – 4.11 (m, 1H), 3.87 (s, 3H), 3.85 (s, 3H), 3.84 – 3.75 (m, 3H), 3.75 – 3.69 (m, 1H), 3.66 - 3.60 (m, 1H), 3.41 (dd,  $J=11.5$ , 10.0, 1H).

$^{13}\text{C}$  NMR (100 MHz,  $\text{CDCl}_3$ )  $\delta$  = 149.27, 149.19, 132.81, 129.62, 123.25, 120.08, 111.22, 108.93, 76.35, 71.14, 66.78, 66.47, 56.02, 55.92.

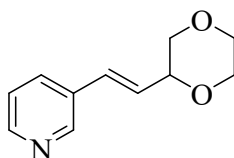

(*E*)-3-(2-(1,4-dioxan-2-yl)vinyl)pyridine

$^1\text{H}$  NMR (400 MHz,  $\text{CDCl}_3$ )  $\delta$  = 8.60 (d,  $J=1.6$ , 1H), 8.48 (dd,  $J=4.8$ , 1.2, 1H), 7.80 – 7.57 (m, 1H), 7.27 – 7.23 (m, 1H), 6.69 (dd,  $J=16.0$ , 0.8, 1H), 6.17 (dd,  $J=16$ , 5.8, 1H), 4.30-4.25 (m, 1H), 3.88 – 3.73 (m, 4H), 3.69-3.65 (m, 1H), 3.41 (dd,  $J=11.4$ , 10, 1H). ).

$^{13}\text{C}$  NMR (100 MHz,  $\text{CDCl}_3$ )  $\delta$  = 148.92, 148.41, 133.29, 132.26, 129.0, 127.80, 123.68, 75.90, 70.93, 66.81, 66.51

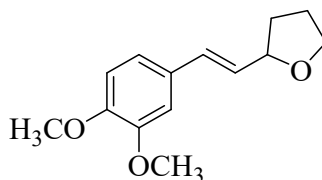

(*E*)-2-(3,4-dimethoxystyryl)tetrahydrofuran

$^1\text{H}$  NMR (400 MHz,  $\text{CDCl}_3$ )  $\delta$  = 6.93 – 6.73 (m, 3H), 6.61 – 6.43 (m, 1H), 6.05 (dd,  $J=15.8$ , 6.8 Hz, 1H), 4.43 (q,  $J=7.0$  Hz, 1H), 3.99 – 3.74 (m, 8H), 2.17 – 1.67 (m, 4H).

$^{13}\text{C}$  NMR (100 Hz,  $\text{CDCl}_3$ )  $\delta$  = 148.99, 148.77, 130.51, 129.91, 128.42, 119.82, 117.27, 111.10, 108.85, 79.96, 68.21, 55.91, 32.52, 26.06.

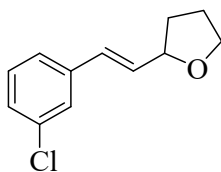

(*E*)-2-(3-chlorostyryl)tetrahydrofuran

$^1\text{H NMR}$  (400 MHz,  $\text{CDCl}_3$ )  $\delta$  = 7.44 – 7.13 (m, 4H), 6.57 – 6.47 (m, 1H), 6.34 – 6.10 (m, 1H), 4.46 (m,  $J$  = 7.4, 1.1 Hz, 1H), 4.03 – 3.75 (m, 2H), 2.21 – 1.63 (m, 4H).

$^{13}\text{C NMR}$  (100 Hz,  $\text{CDCl}_3$ )  $\delta$  = 138.87, 134.53, 132.32, 130.15, 129.27, 127.48, 126.57, 124.81, 79.44, 68.33, 32.42, 25.96.

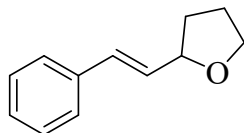

(*E*)-2-styryltetrahydrofuran

$^1\text{H NMR}$  (400 MHz,  $\text{CDCl}_3$ )  $\delta$  = 7.40 – 7.34 (m, 2H), 7.34 – 7.26 (m, 2H), 7.23 – 7.18 (m, 1H), 6.59 (t,  $J$  = 11.7 Hz, 1H), 6.26 – 6.15 (m, 1H), 4.46 (m,  $J$  = 7.6, 1.0 Hz, 1H), 4.01 – 3.92 (m, 1H), 3.82 (m,  $J$  = 14.0, 7.8, 3.9 Hz, 1H), 2.20 – 2.06 (m, 1H), 2.05 – 1.87 (m, 2H), 1.78 – 1.66 (m, 1H).

$^{13}\text{C NMR}$  (100 Hz,  $\text{CDCl}_3$ )  $\delta$  = 136.96, 130.66, 130.52, 128.63, 127.56, 126.50, 79.74, 68.25, 32.47, 25.99.

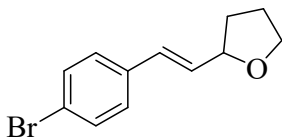

(*E*)-2-(4-bromostyryl)tetrahydrofuran

$^1\text{H NMR}$  (400 MHz,  $\text{CDCl}_3$ )  $\delta$  7.45 – 7.40 (m, 2H), 7.27 – 7.22 (m, 2H), 6.52 (d,  $J$  = 15.9 Hz, 1H), 6.23 – 6.17 (m, 1H), 4.46 (q,  $J$  = 6.8 Hz, 1H), 3.99 – 3.82 (m, 2H), 2.17 – 1.60 (m, 6H).

$^{13}\text{C NMR}$  (100 Hz,  $\text{CDCl}_3$ )  $\delta$  = 135.84, 131.62, 131.40, 129.21, 128.00, 121.23, 79.47, 68.24, 32.34, 25.92.

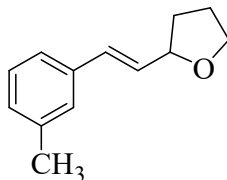

(*E*)-2-(3-methylstyryl)tetrahydrofuran

$^1\text{H NMR}$  (400 MHz,  $\text{CDCl}_3$ )  $\delta$  = 7.39 – 6.94 (m, 4H), 6.57 (t,  $J$  = 15.4 Hz, 1H), 6.31 – 6.01 (m, 1H), 4.46 (q,  $J$  = 6.9 Hz, 1H), 4.09 – 3.75 (m, 2H), 2.33 (s, 3H), 2.24 – 1.63 (m, 4H).

$^{13}\text{C NMR}$  (100 Hz,  $\text{CDCl}_3$ )  $\delta$  = 138.12, 136.89, 130.64, 130.39, 128.53, 128.39, 127.32, 123.71, 79.95, 68.55, 32.50, 25.87, 21.91.

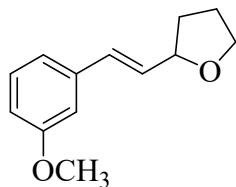

(*E*)-2-(3-methoxystyryl)tetrahydrofuran

$^1\text{H}$  NMR (400 MHz,  $\text{CDCl}_3$ )  $\delta$ = 7.28 – 6.73 (m, 4H), 6.54 (d,  $J$  = 15.8 Hz, 1H), 6.18 (m,  $J$  = 18.7, 12.1, 7.6 Hz, 1H), 4.46 (m,  $J$  = 7.6, 1.0 Hz, 1H), 4.01 – 3.80 (m, 2H), 3.80 – 3.76 (m, 3H), 2.24 – 1.66 (m, 4H).

$^{13}\text{C}$  NMR (100 Hz,  $\text{CDCl}_3$ )  $\delta$ = 159.95, 138.46, 130.95, 130.94, 129.59, 119.56, 113.81, 112.12, 79.94, 68.27, 55.39, 32.91, 25.88.

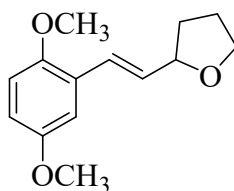

(*E*)-2-(2,5-dimethoxystyryl)tetrahydrofuran

$^1\text{H}$  NMR (400 MHz,  $\text{CDCl}_3$ )  $\delta$ = 6.99 (d,  $J$  = 2.8 Hz, 1H), 6.92 – 6.70 (m, 3H), 6.31 – 6.10 (m, 1H), 4.45 (q,  $J$  = 7.1 Hz, 1H), 3.95 (m,  $J$  = 14.5, 7.4 Hz, 1H), 3.85 – 3.78 (m, 1H), 3.77 (s, 3H), 3.75 (s, 3H), 2.18 – 1.64 (m, 4H).

$^{13}\text{C}$  NMR (100 Hz,  $\text{CDCl}_3$ )  $\delta$ = 153.92, 151.40, 131.57, 126.83, 125.38, 113.82, 112.35, 112.14, 112.07, 80.20, 68.36, 56.27, 32.55, 25.97.

# NMR Spectra

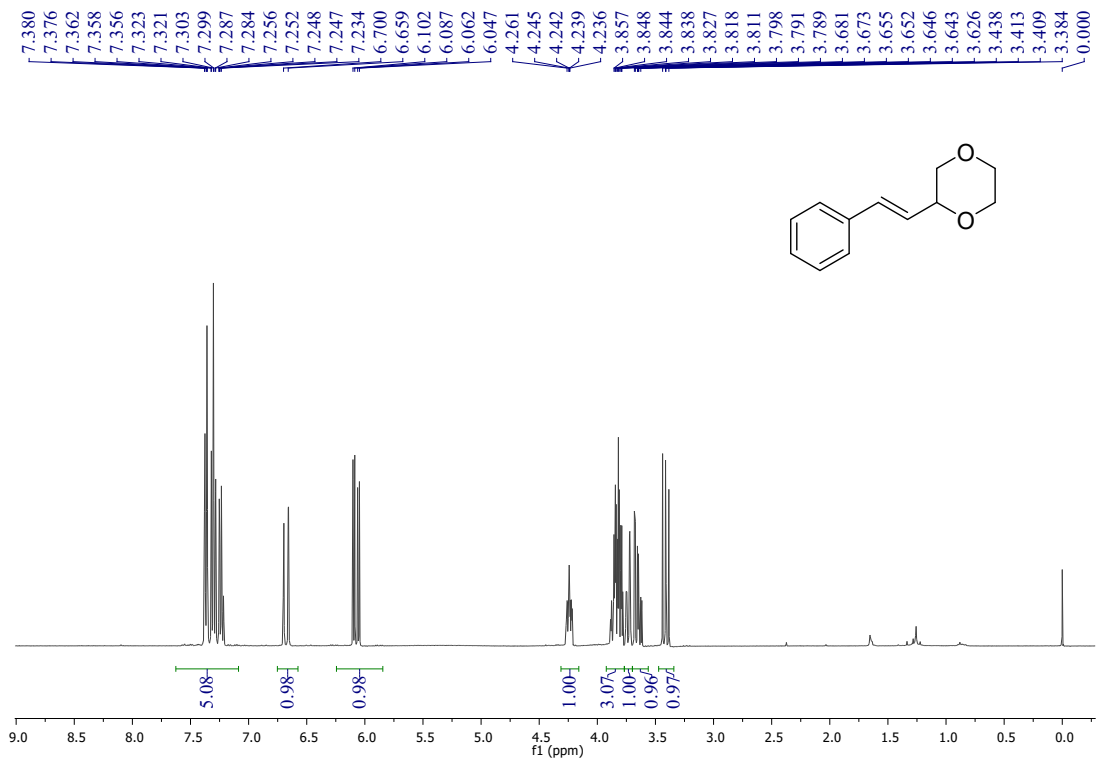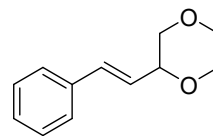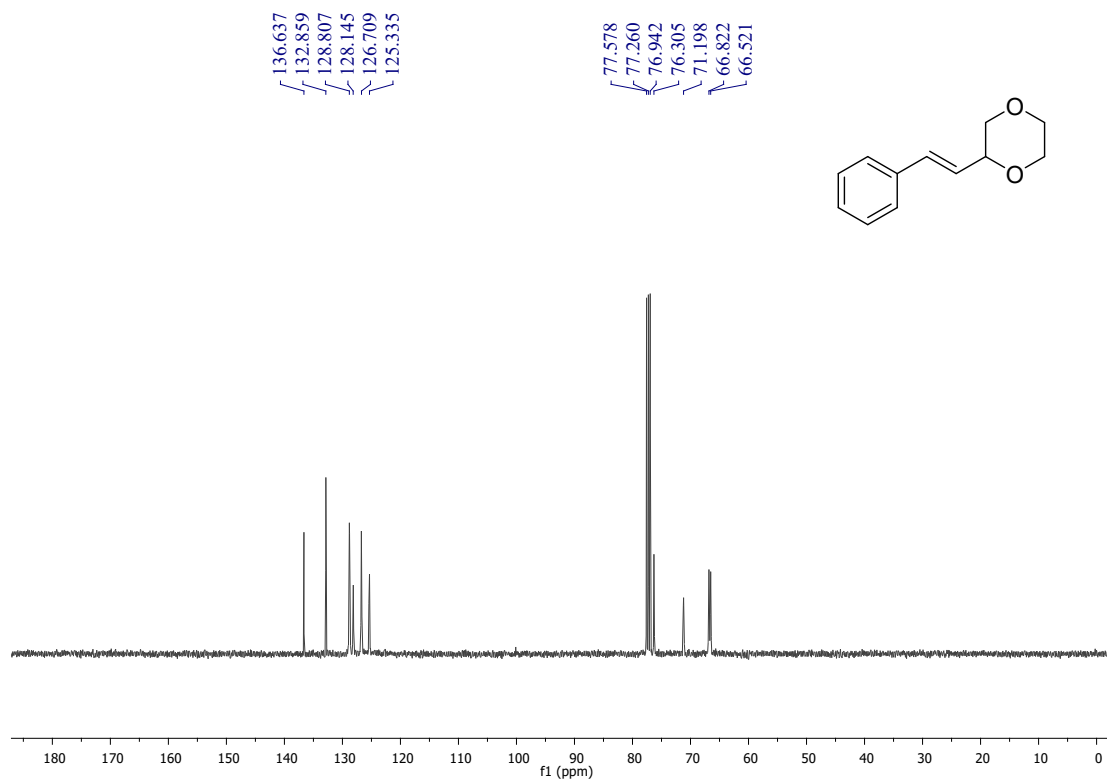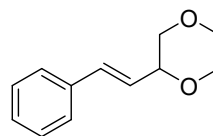

7.299  
7.284  
7.276  
7.271  
7.264  
7.248  
7.248  
6.644  
6.603  
6.070  
6.055  
6.030  
6.015  
4.248  
4.244  
4.236  
4.232  
4.229  
4.226  
4.223  
4.219  
4.211  
3.874  
3.853  
3.845  
3.839  
3.833  
3.819  
3.813  
3.806  
3.790  
3.784  
3.777  
3.754  
3.750  
3.748  
3.725  
3.722  
3.719  
3.674  
3.666  
3.647  
3.645  
3.639  
3.636  
3.619  
3.419  
3.394  
3.390  
3.365

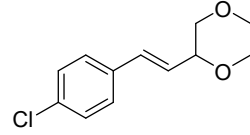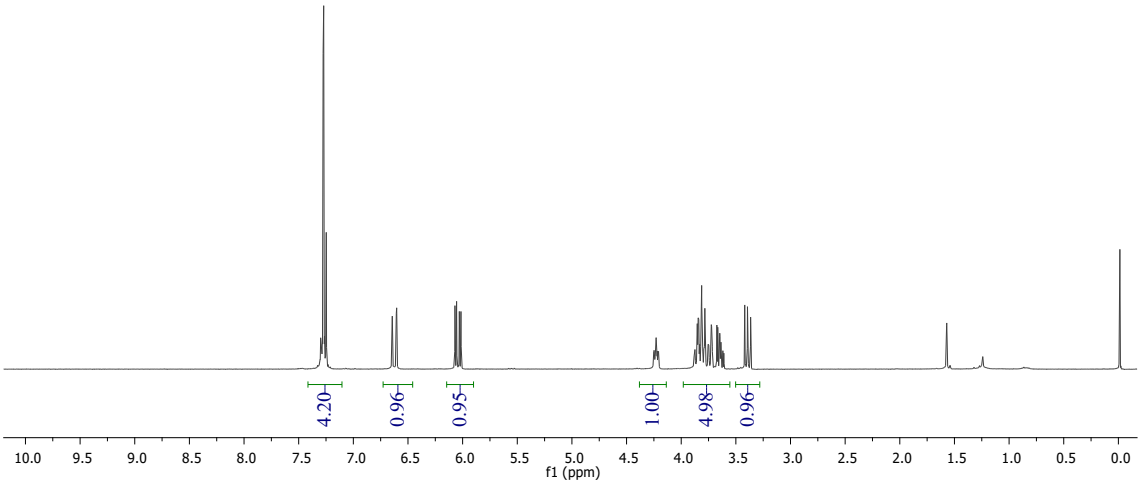

134.972  
133.660  
131.459  
128.846  
127.792  
125.862

77.420  
77.103  
76.785  
75.974  
70.951  
66.694  
66.378

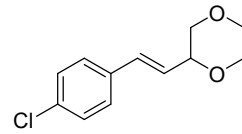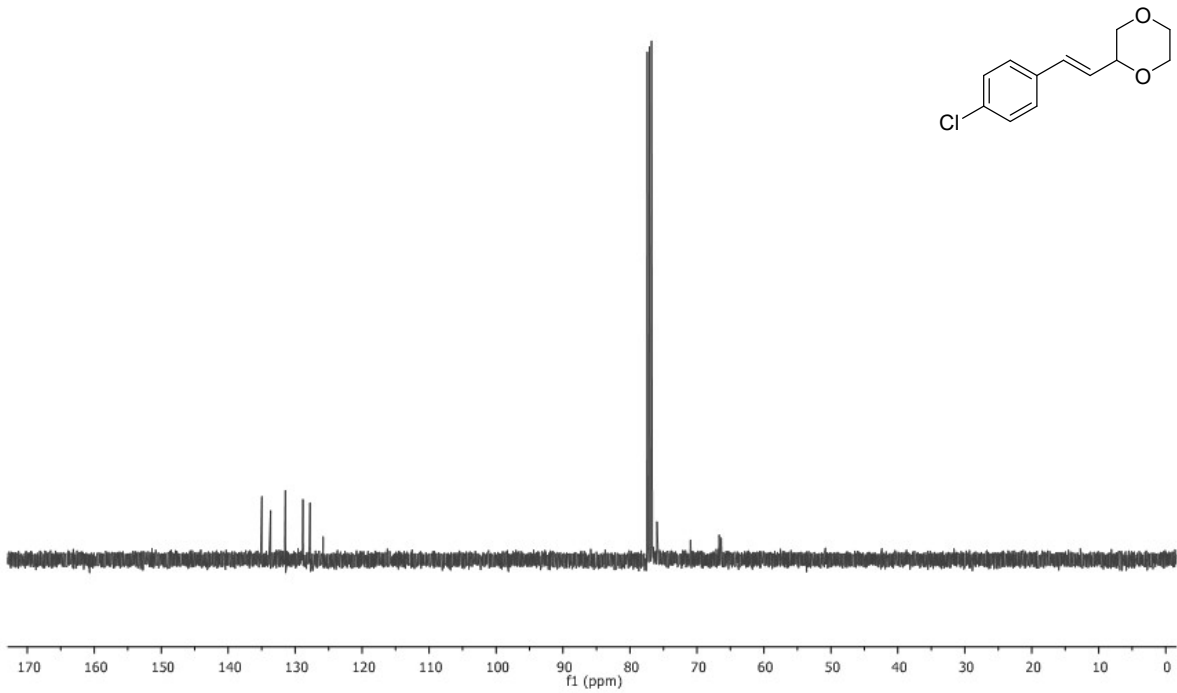



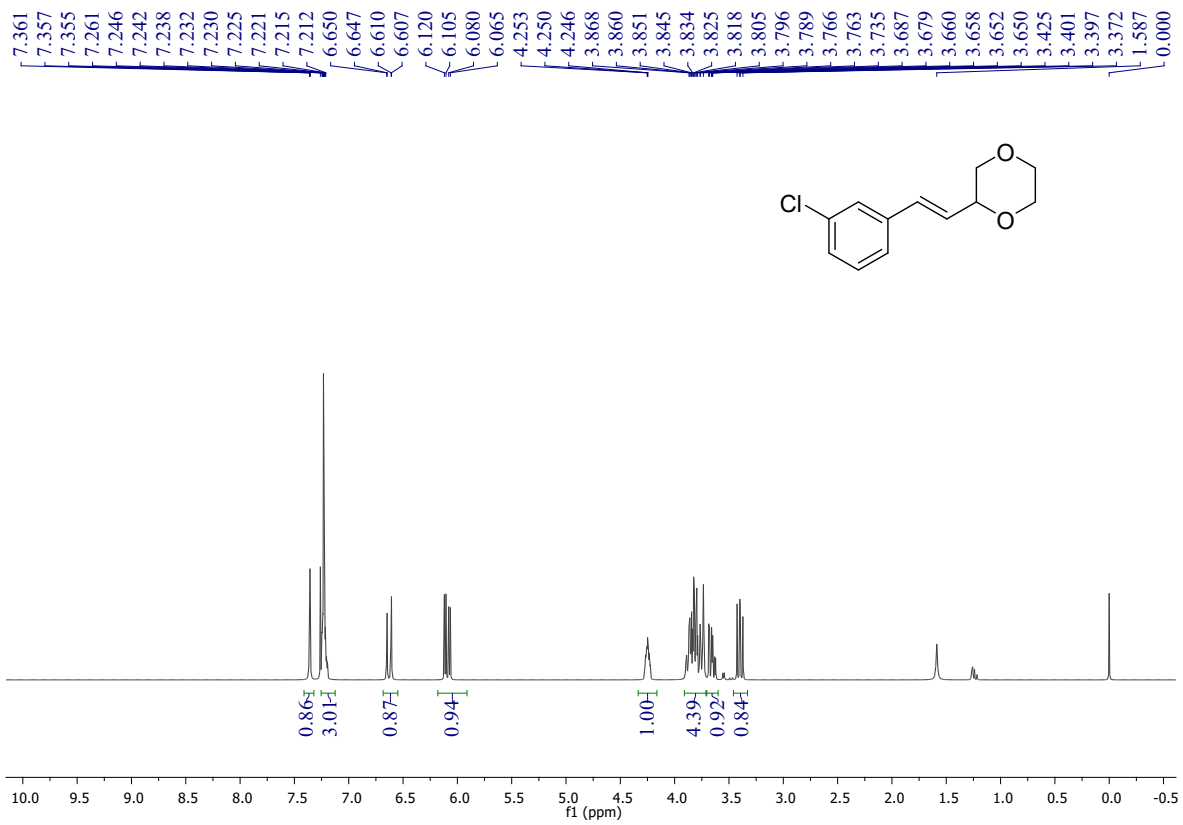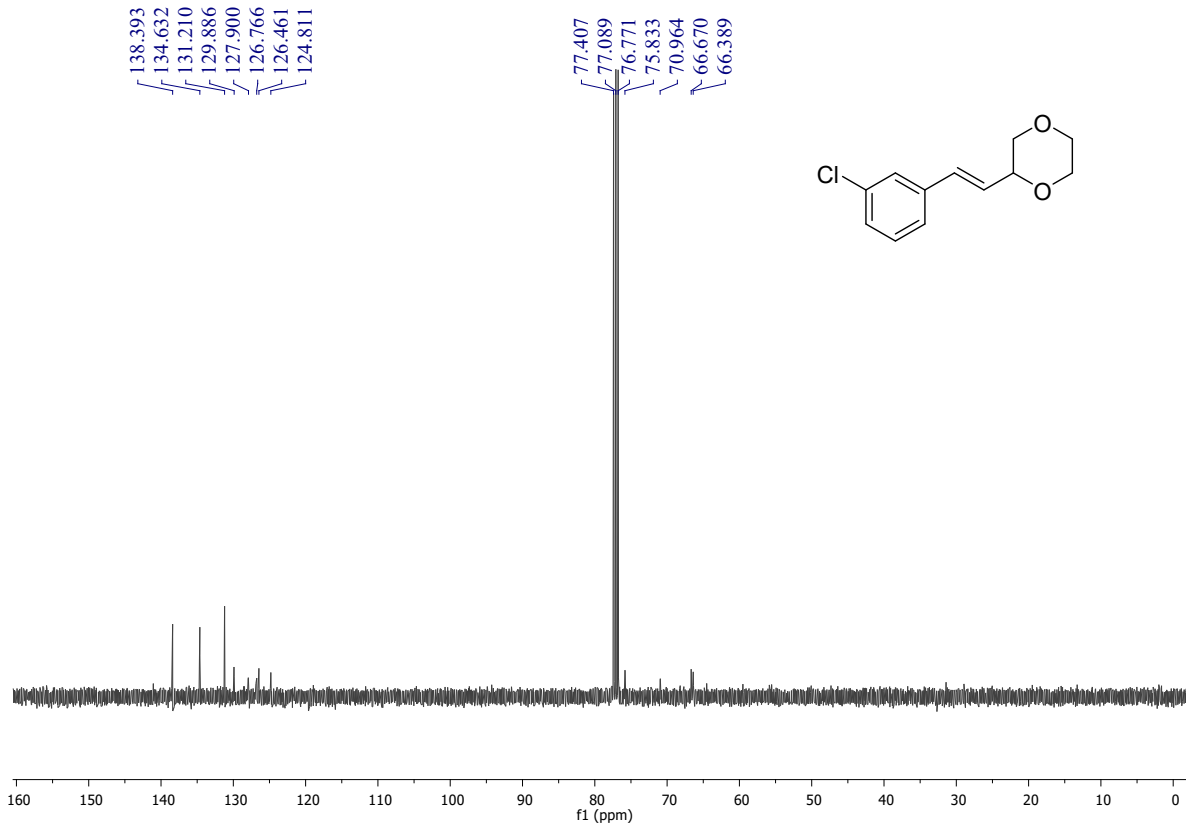

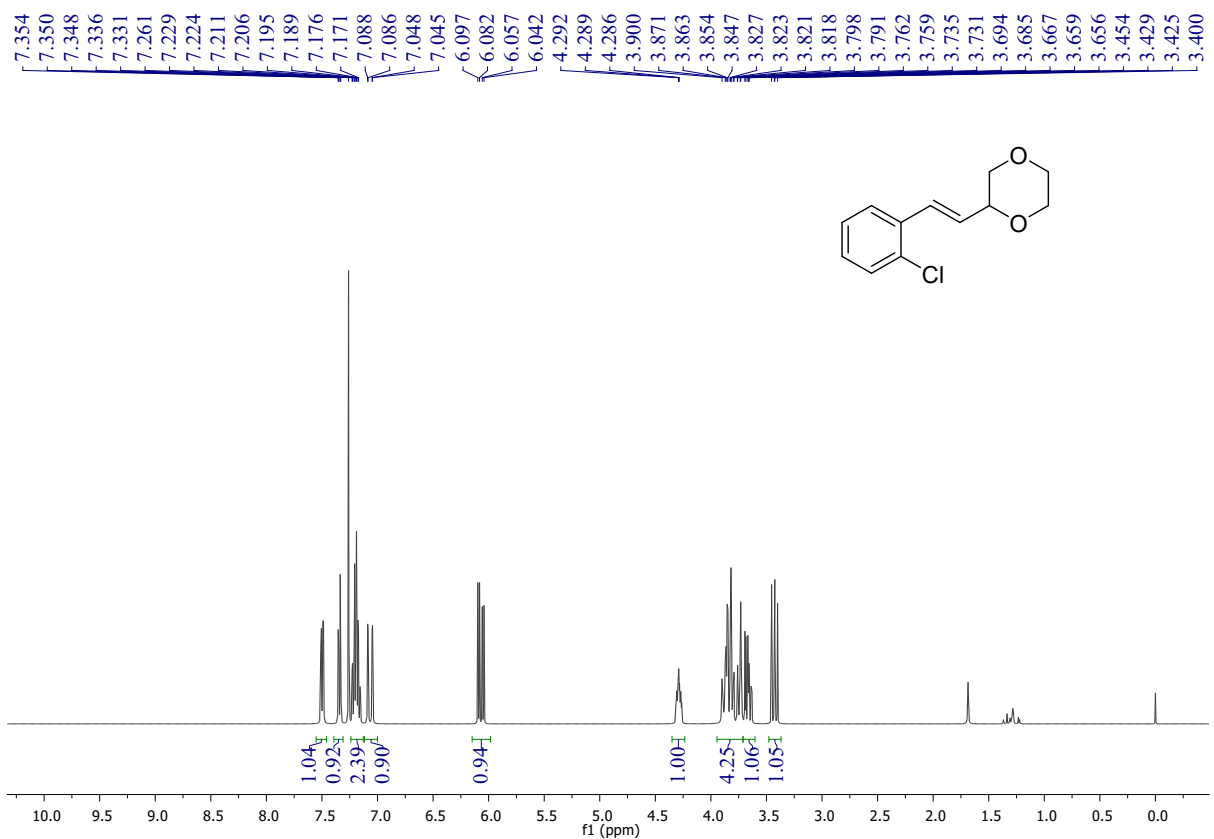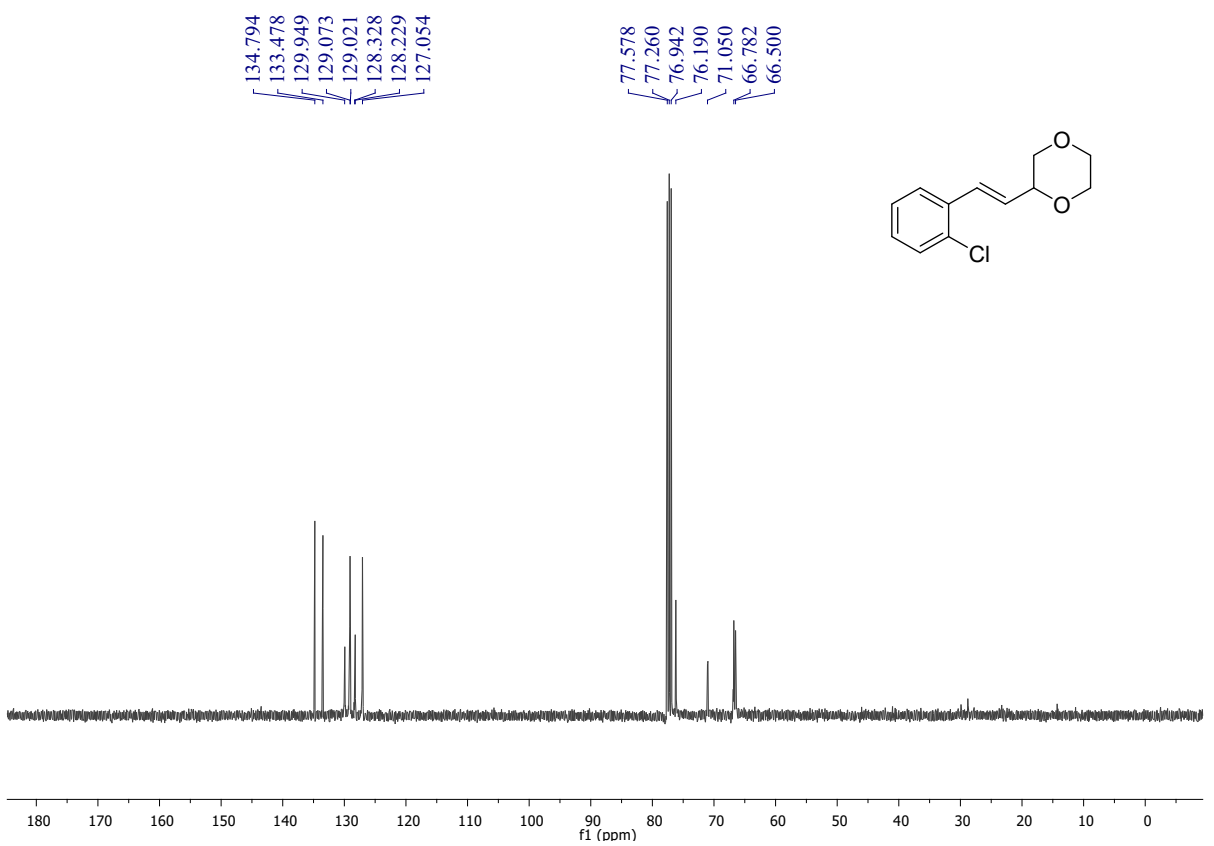

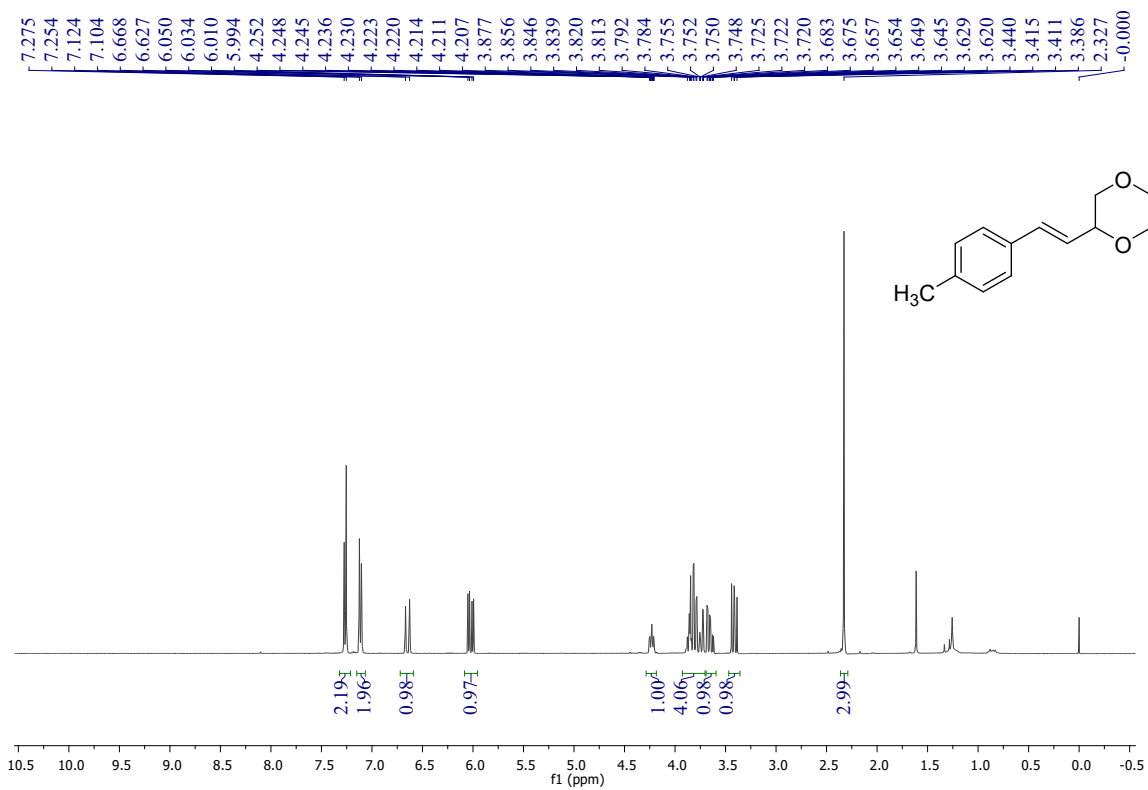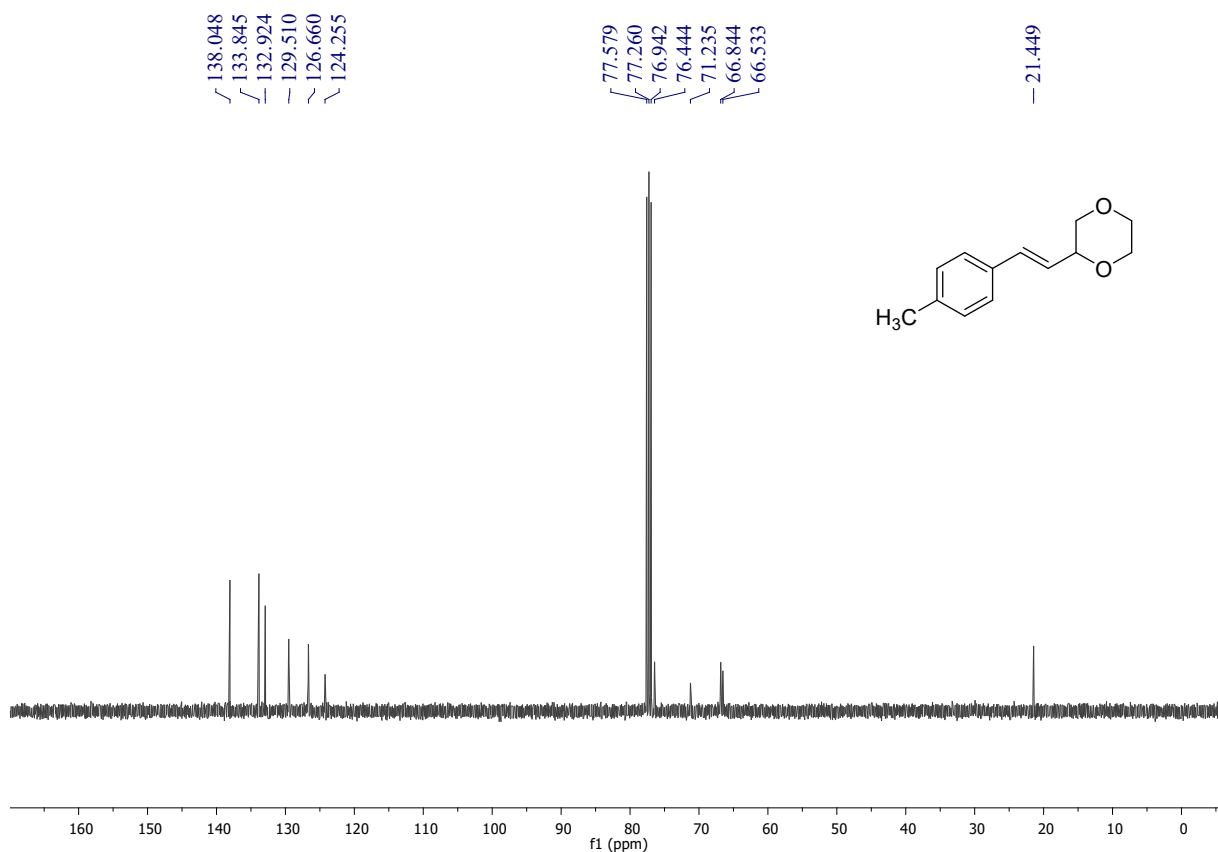

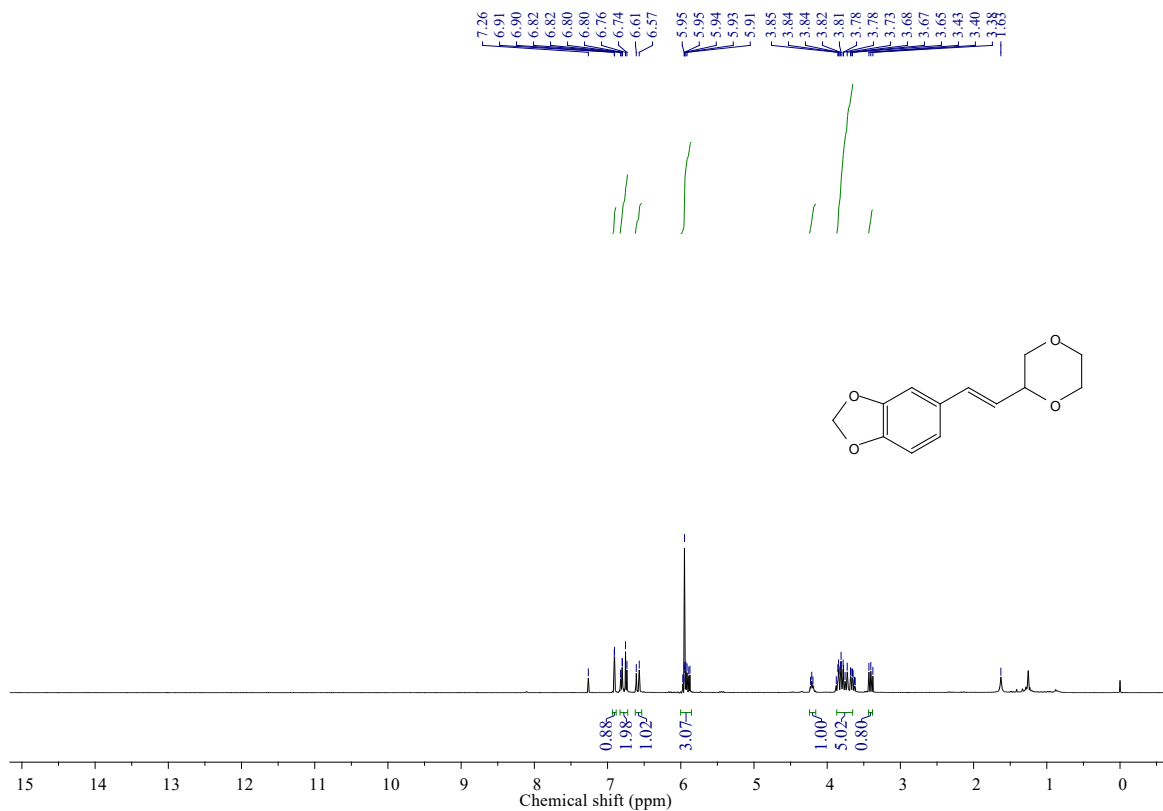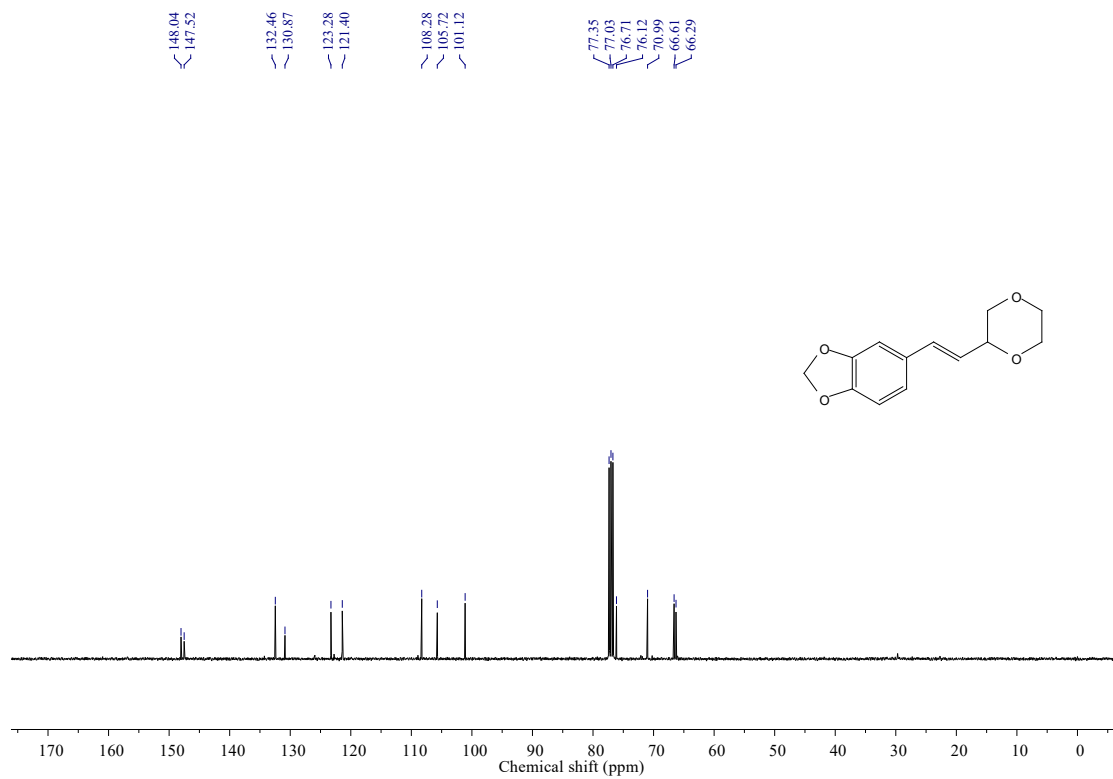

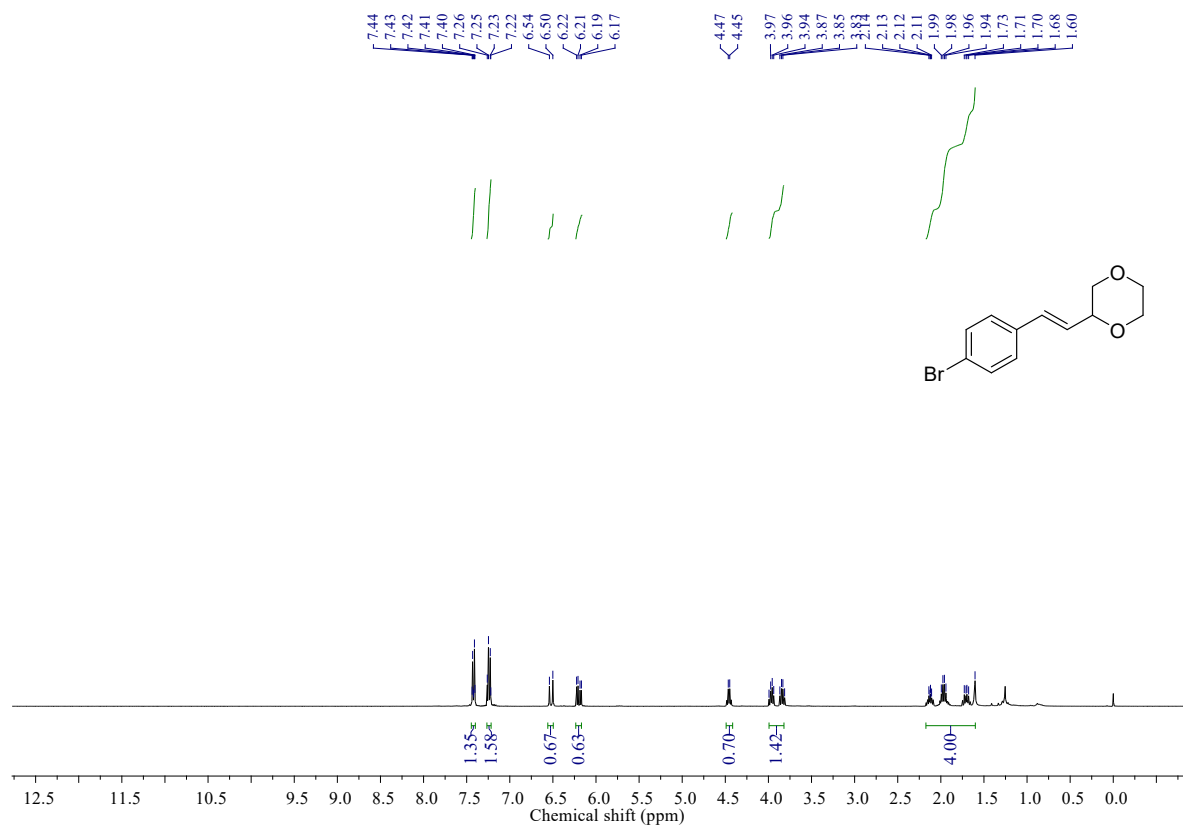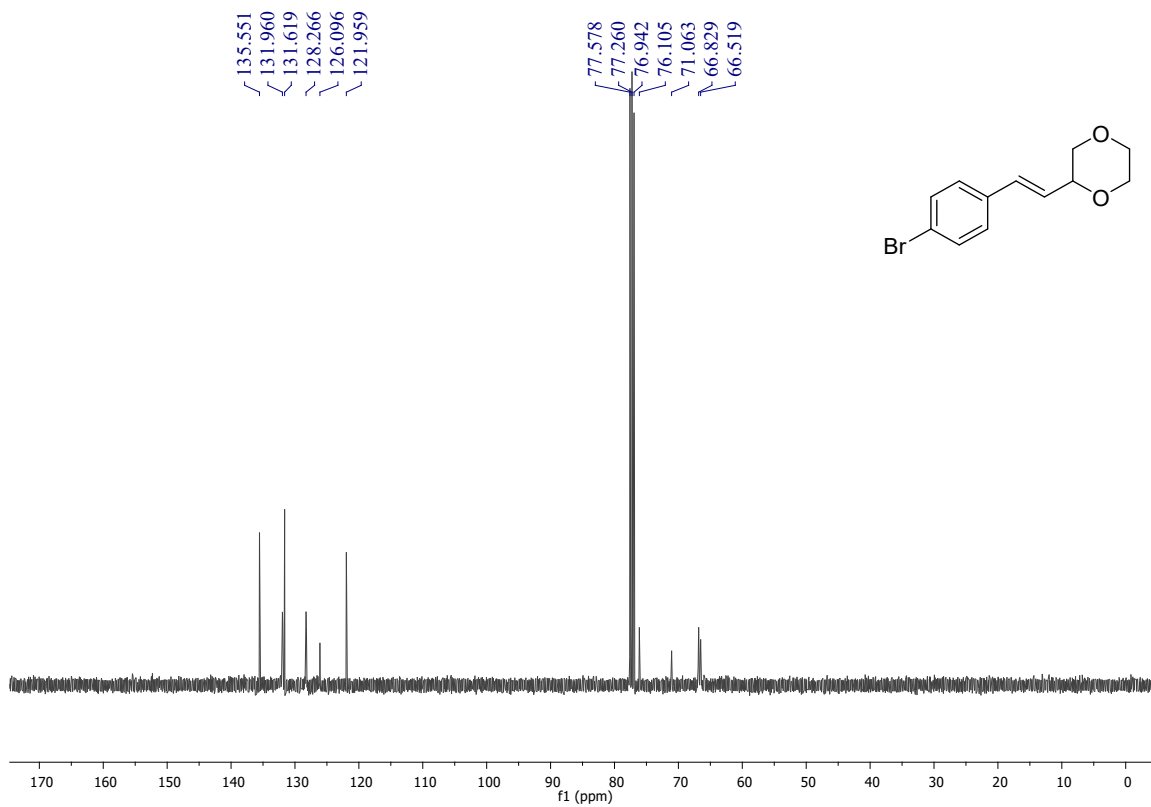

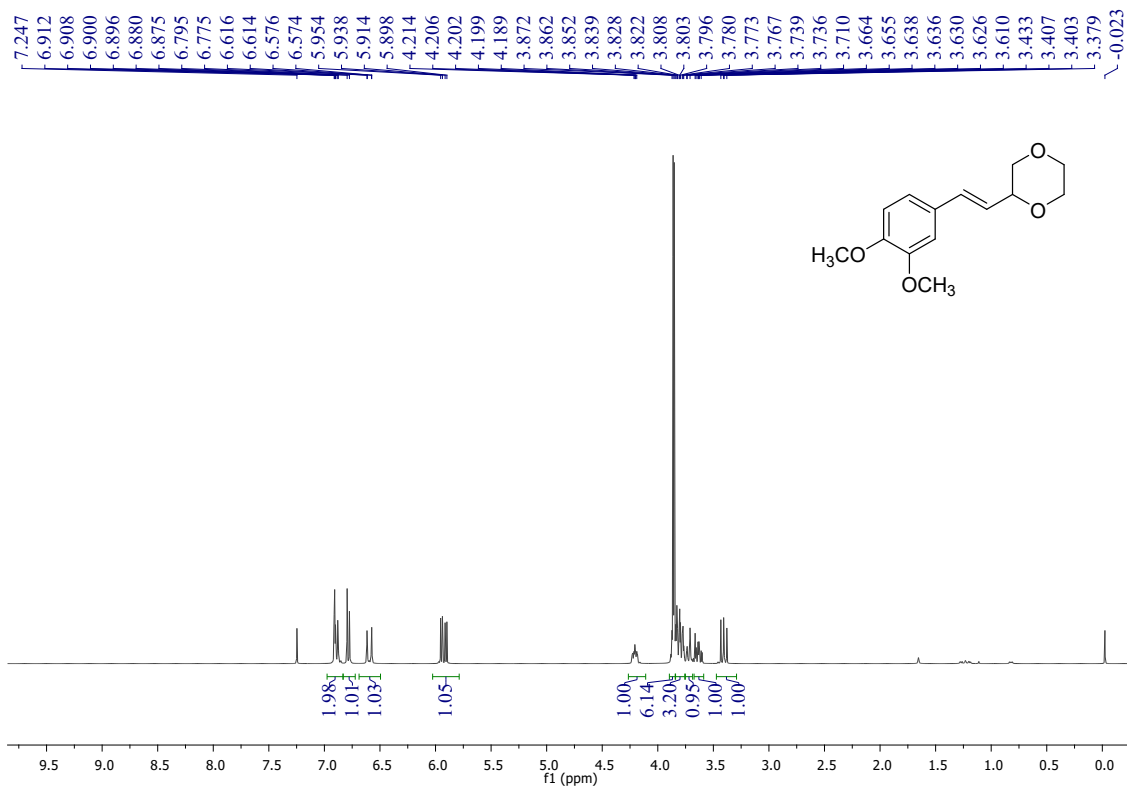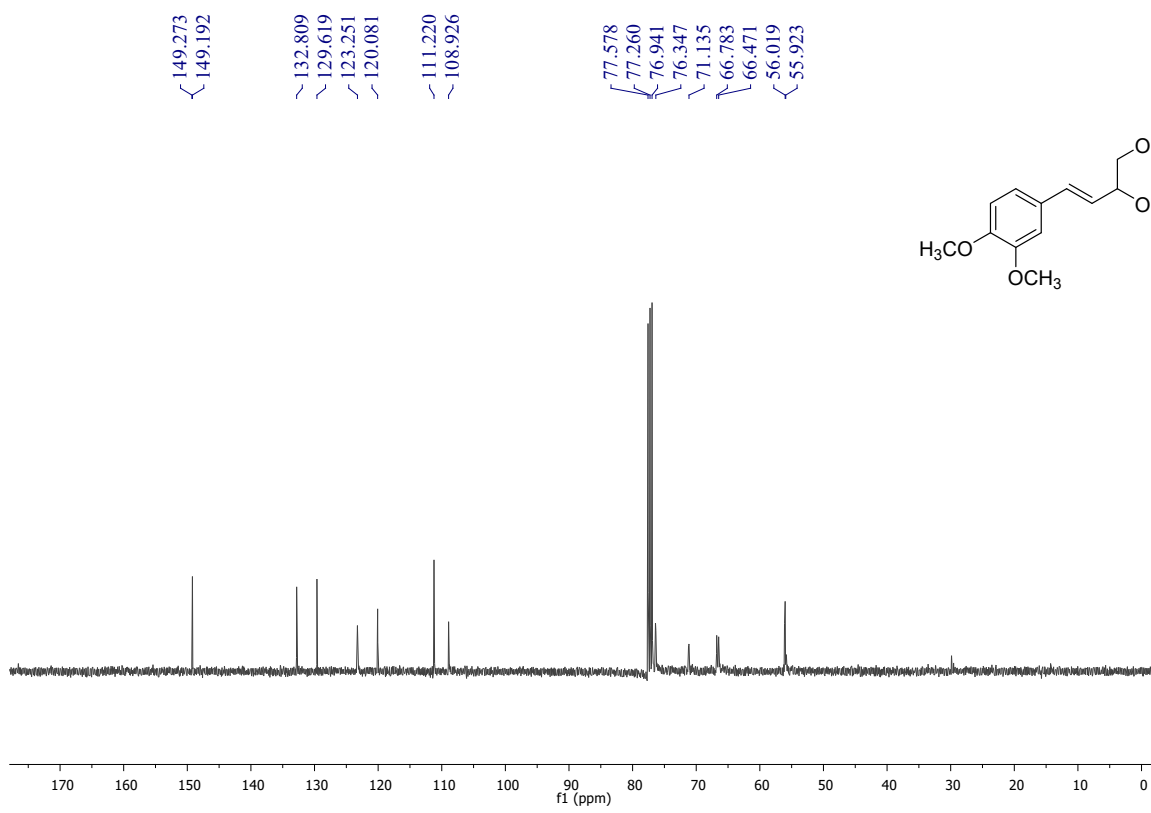

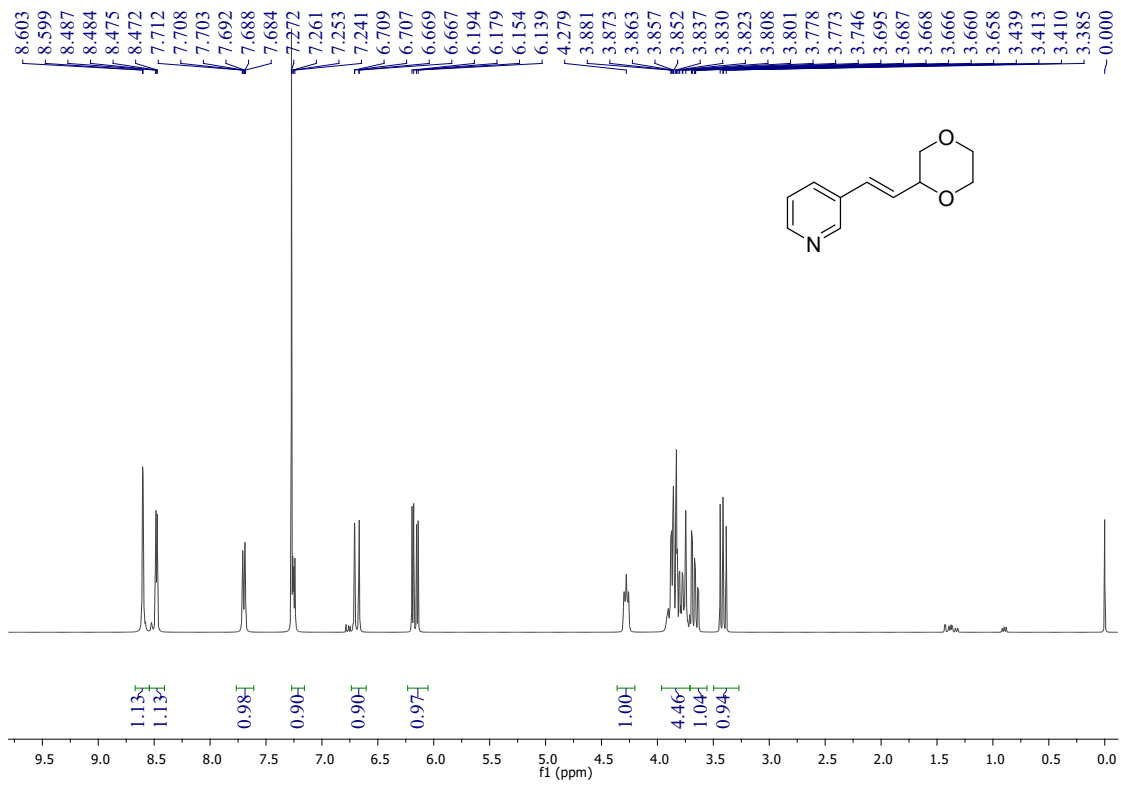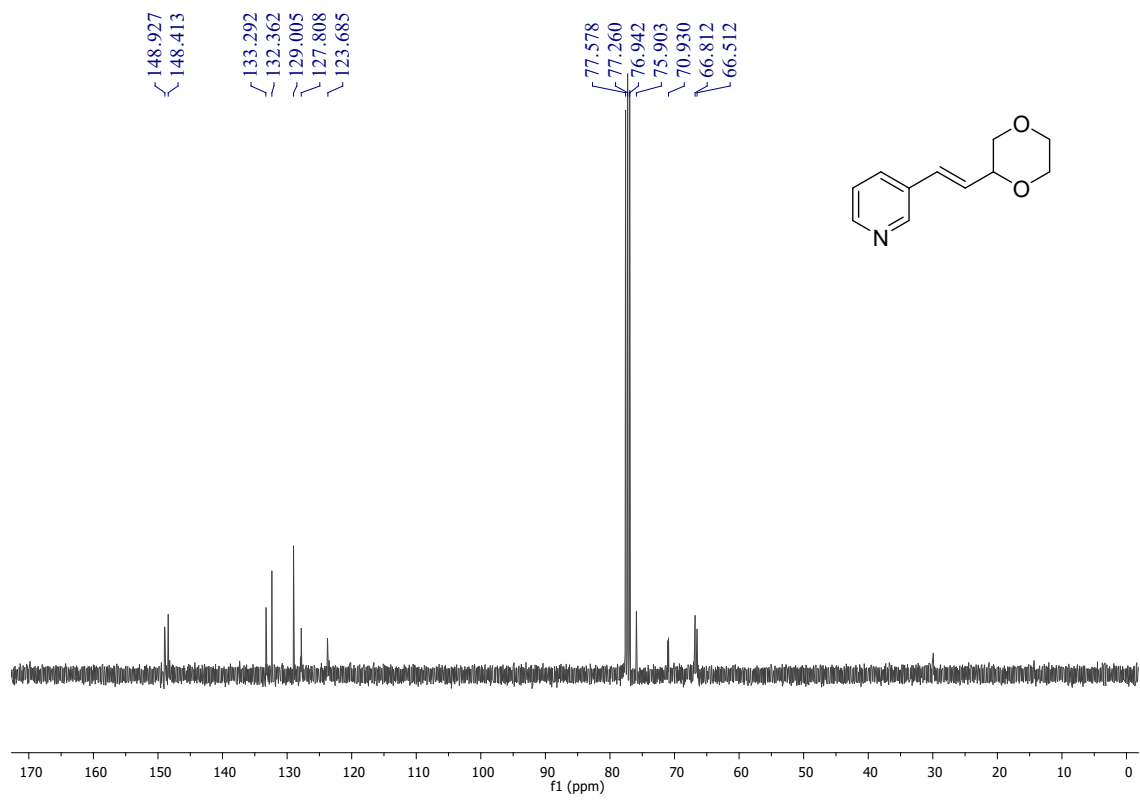

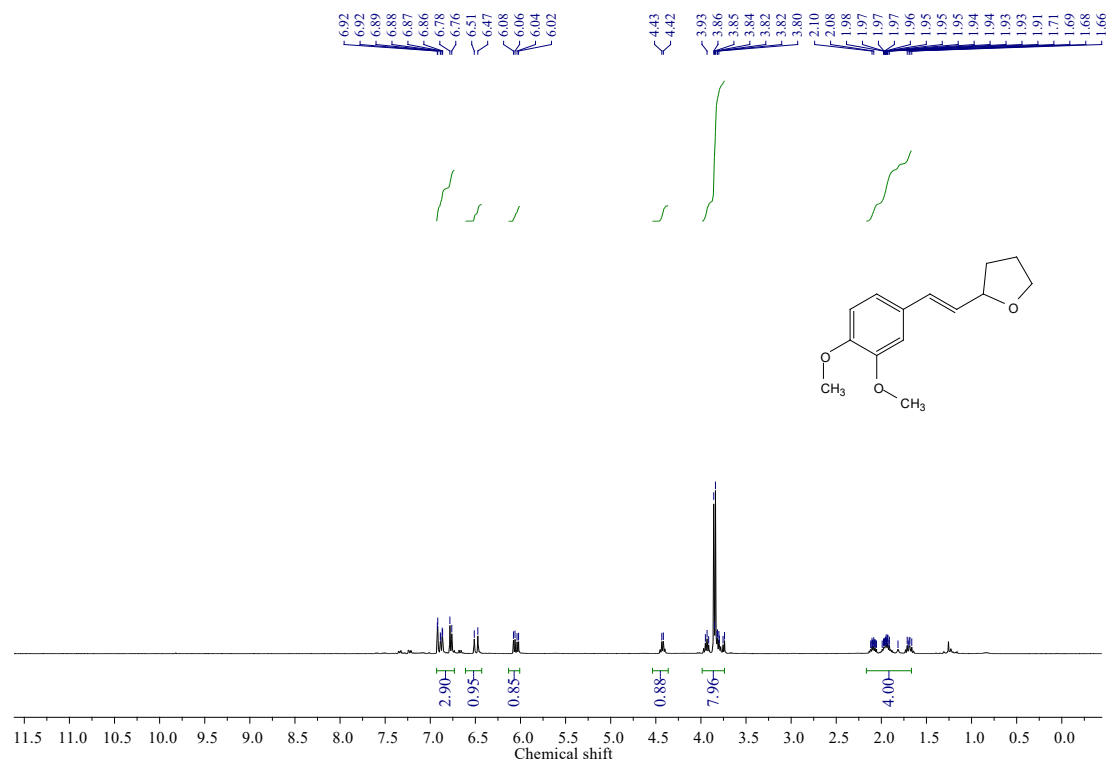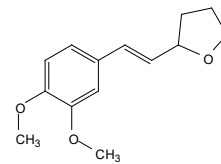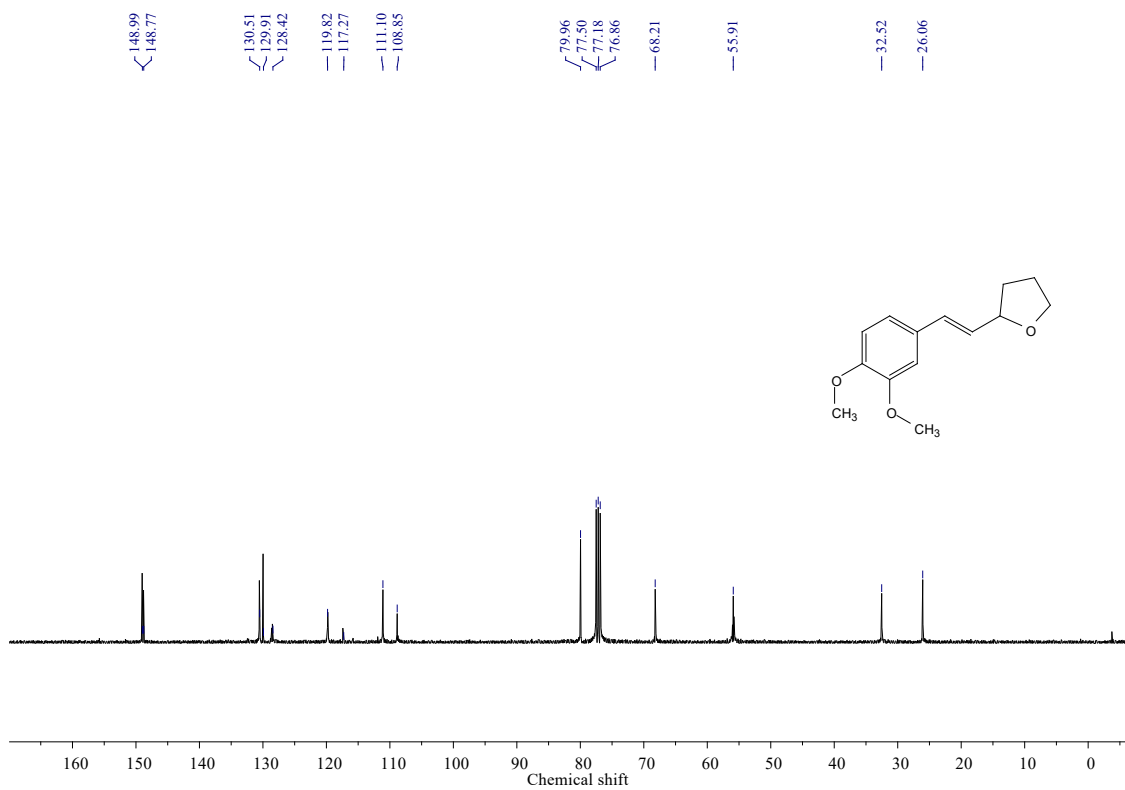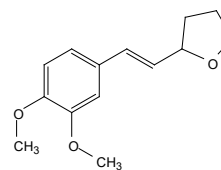



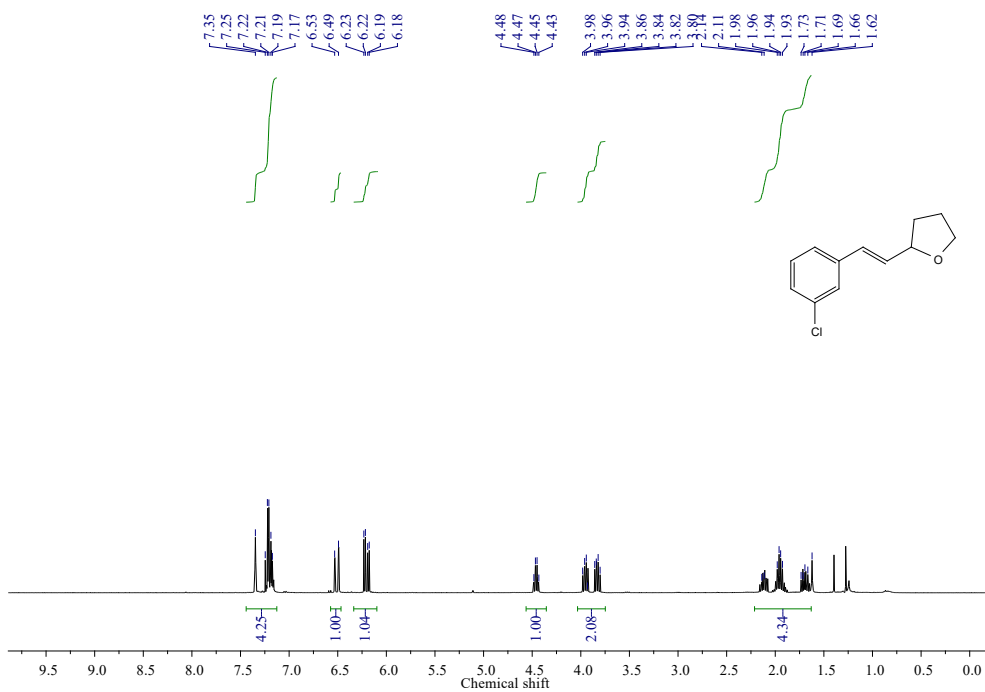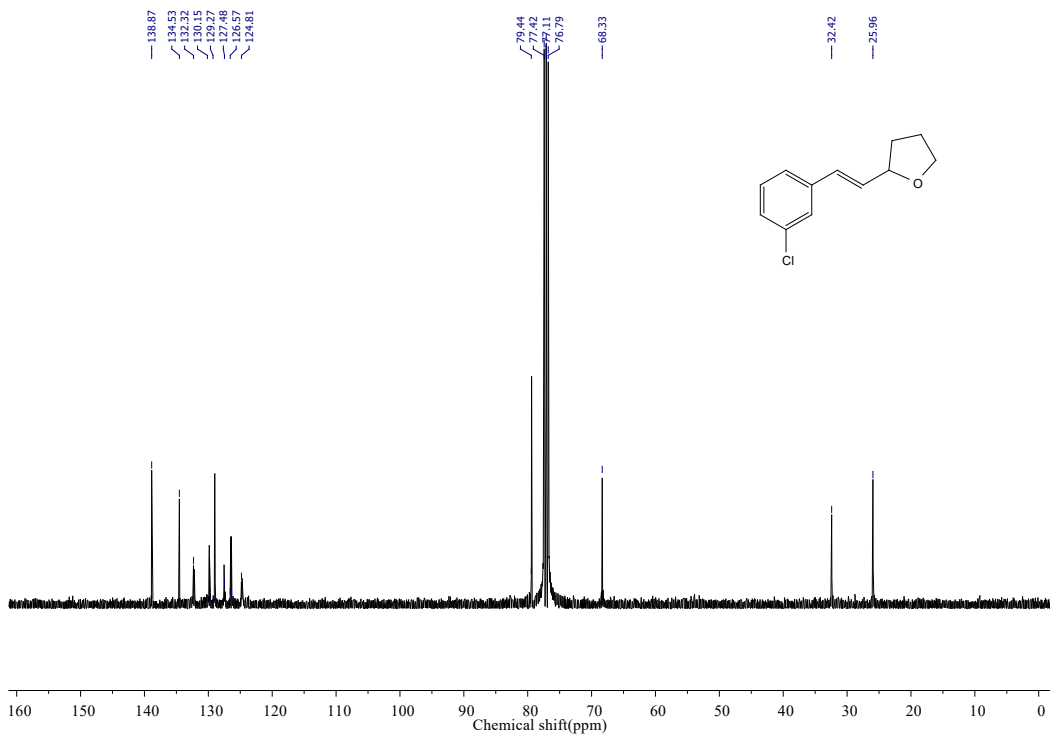

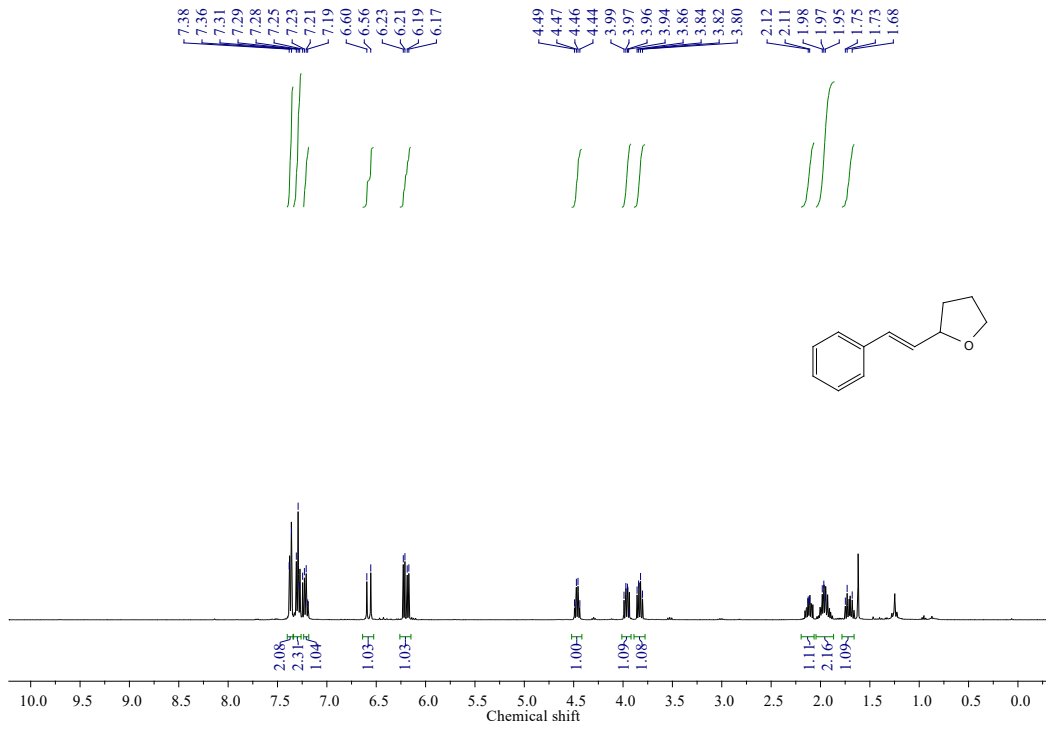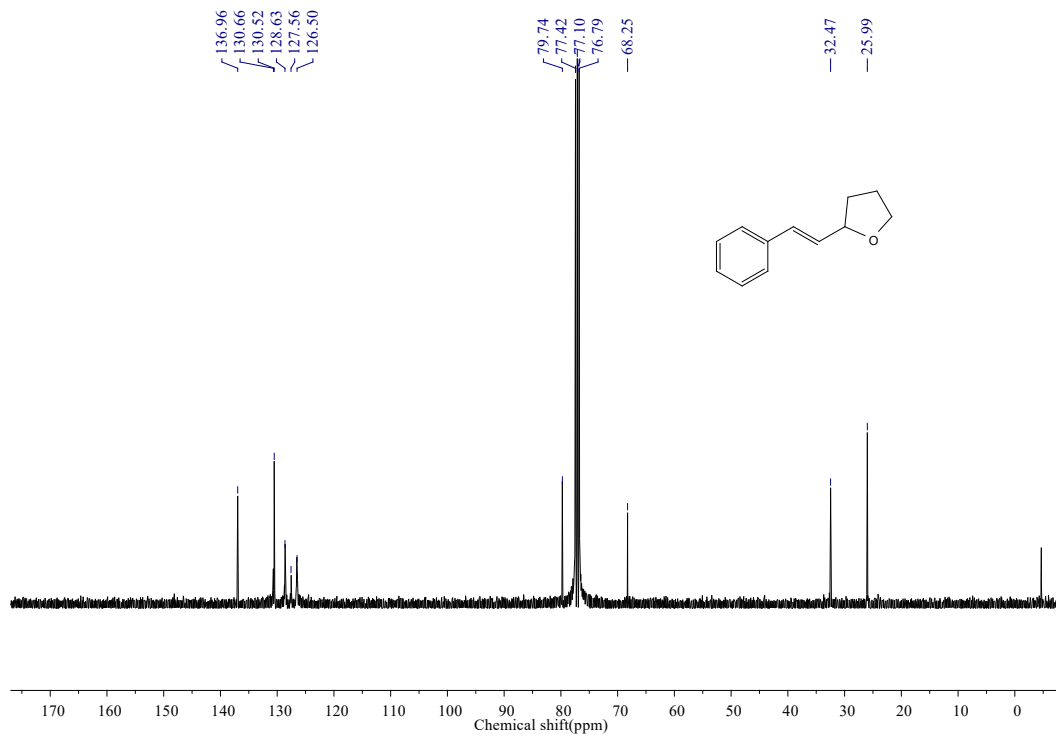

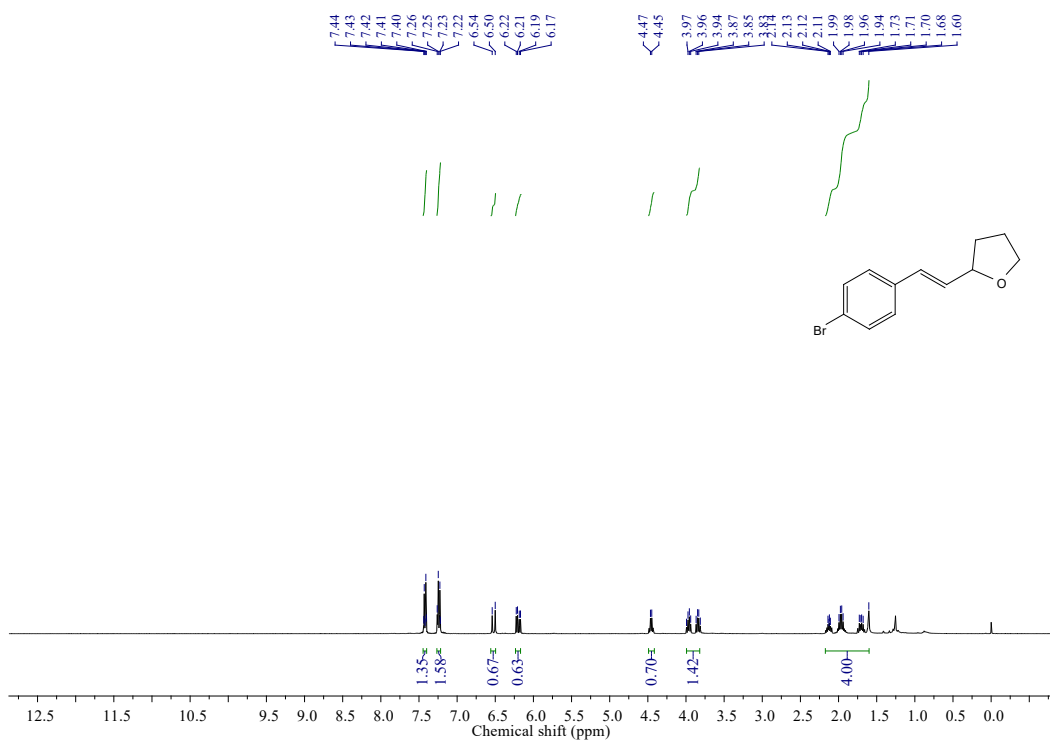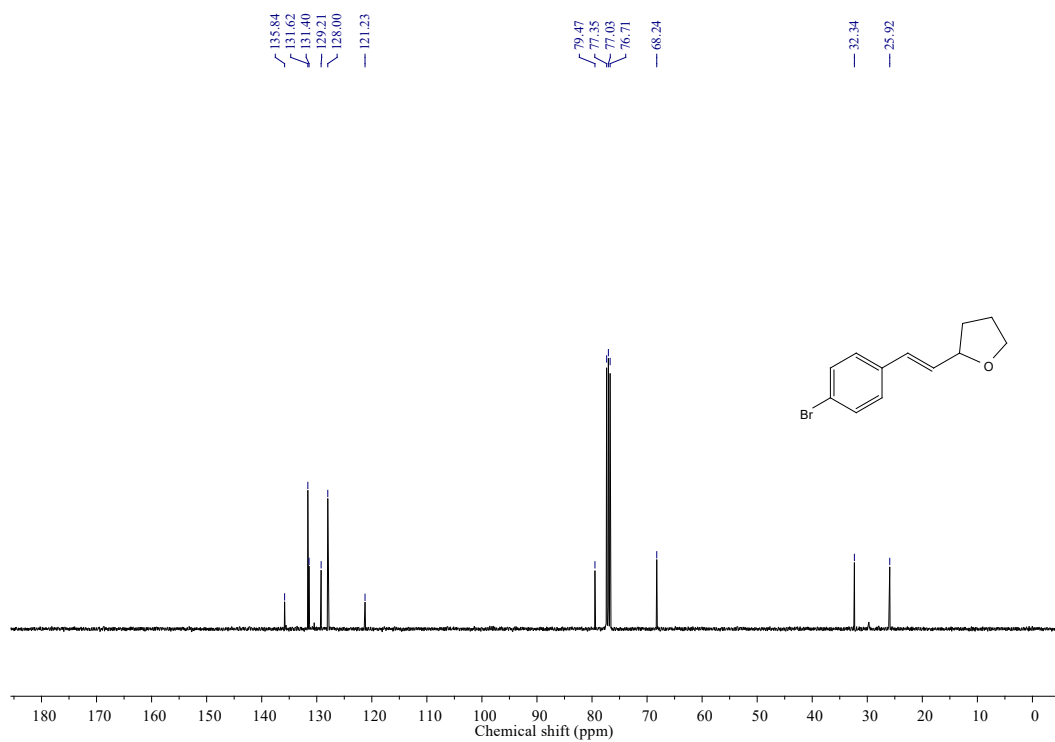

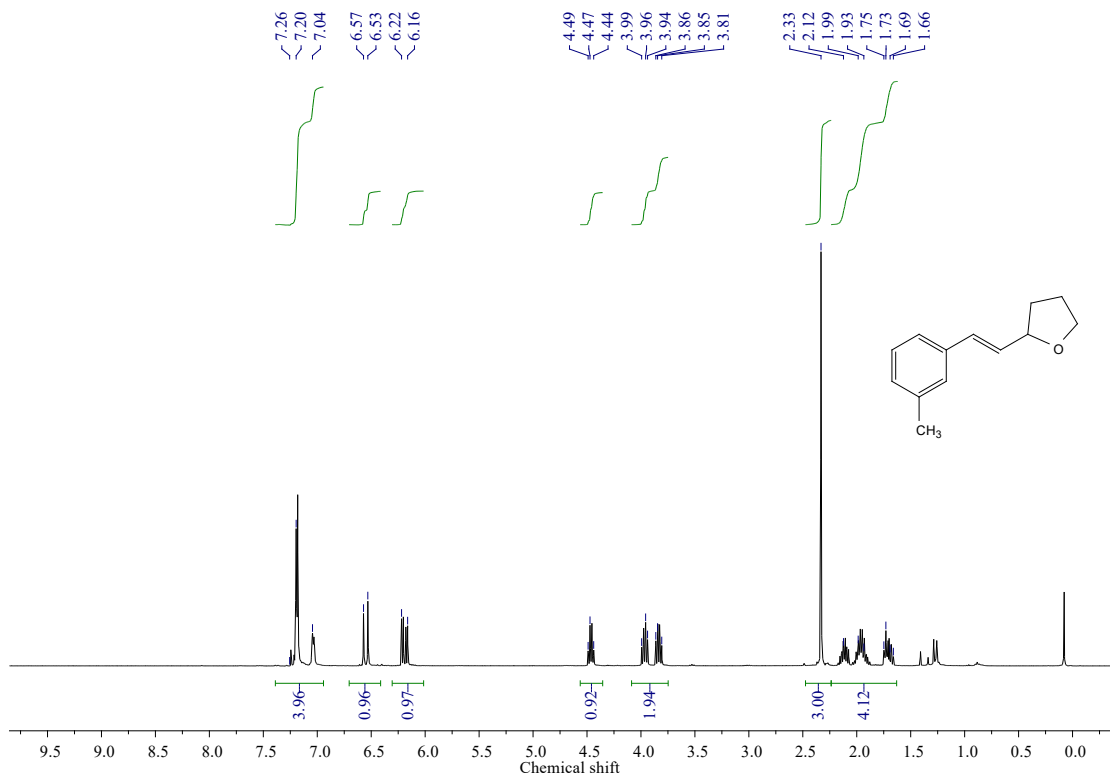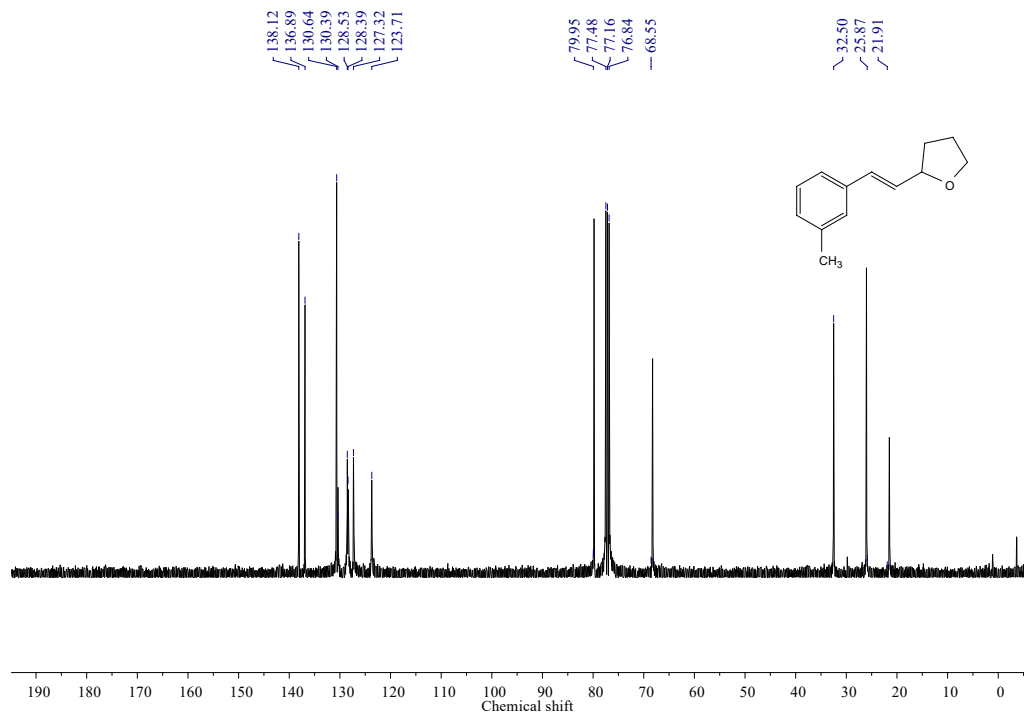

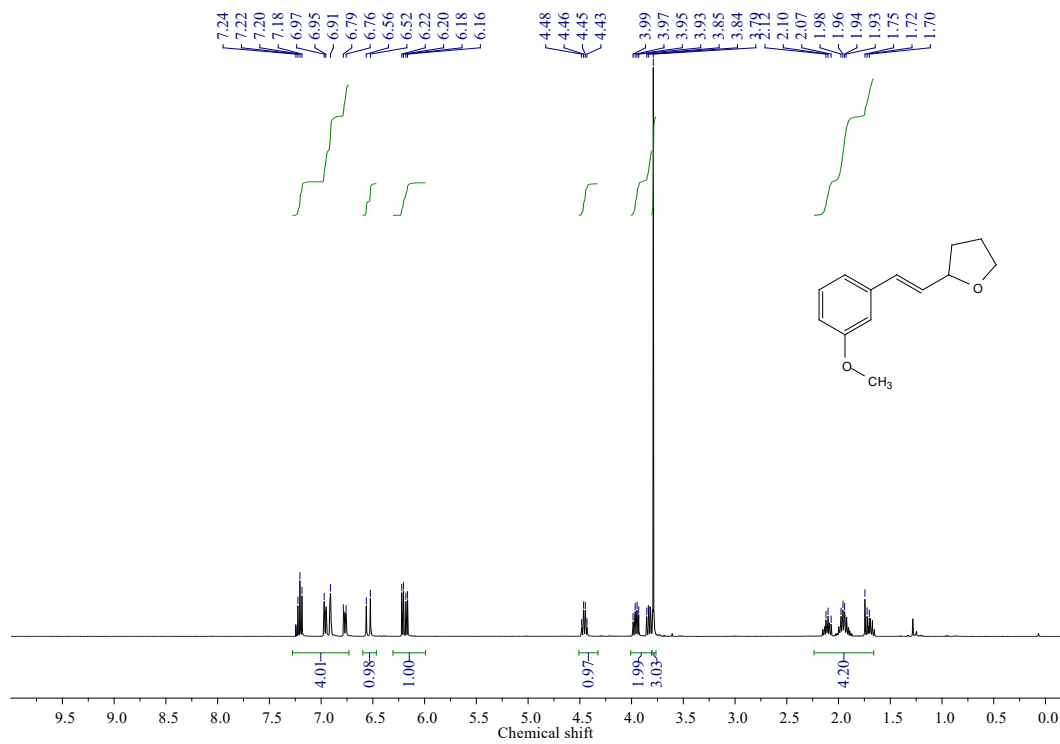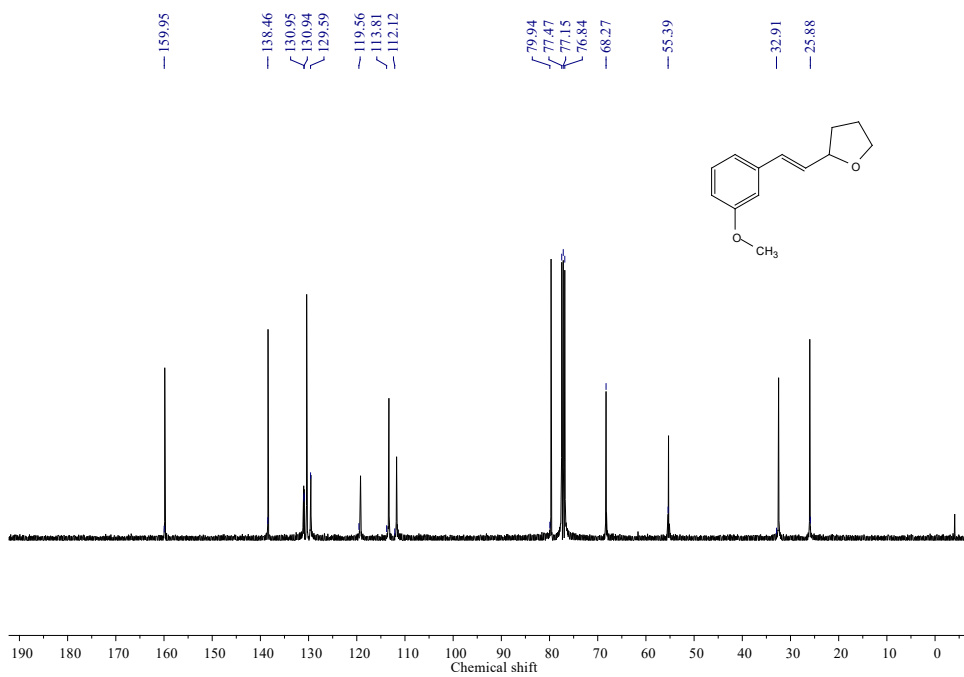

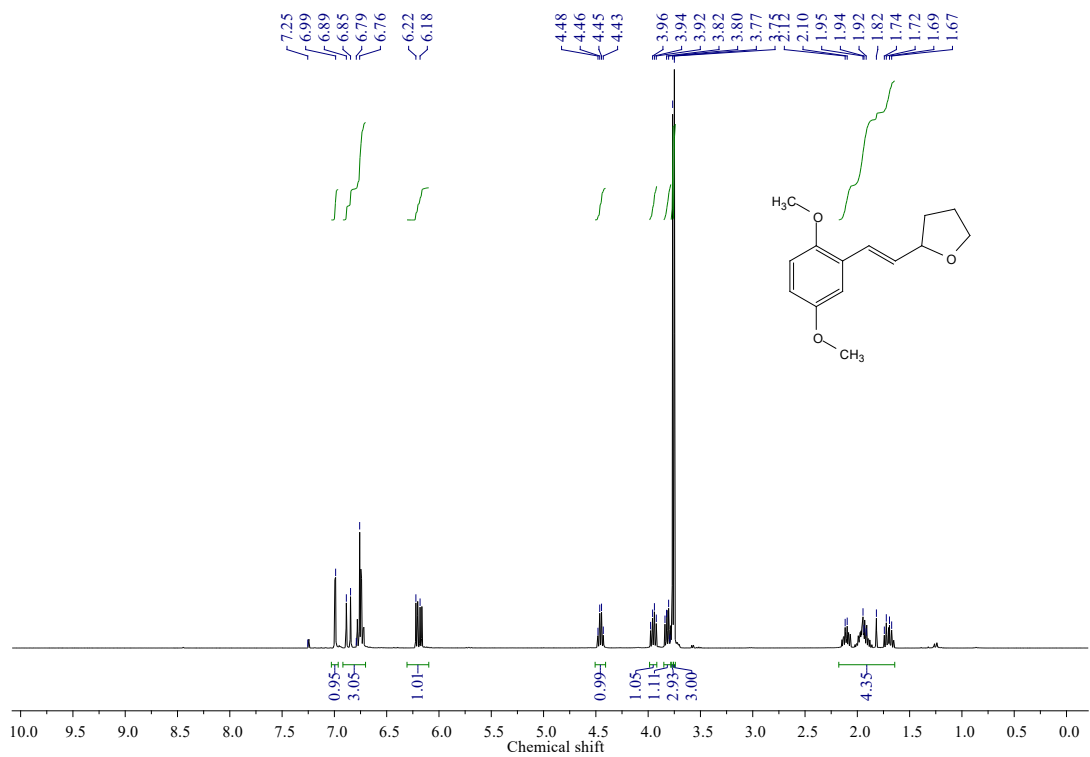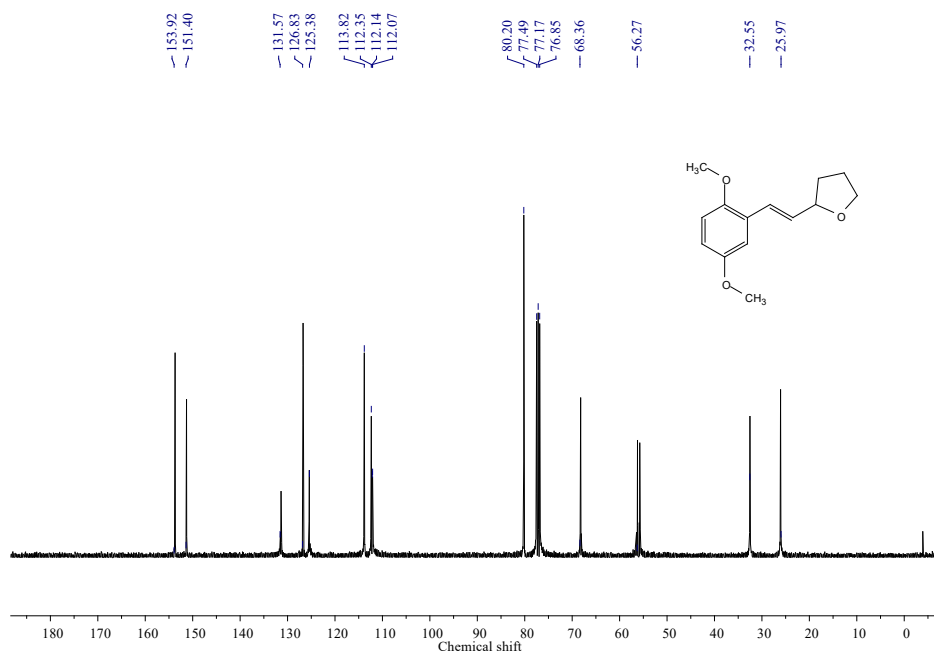

Supplement: d2nj01213h1.pdf [file d2nj01213h1.pdf]
